# Supplementary material for: Mental Health during the COVID-19 Lockdown over the Christmas Period in Austria and the Effects of Sociodemographic and Lifestyle Factors
Source: Int J Environ Res Public Health. 2021 Apr 1;18(7):3679. doi: 10.3390/ijerph18073679 (PMC8036255; doi:10.3390/ijerph18073679)
Supplement: Supplementary file 1 [file ijerph-18-03679-s001.pdf]

## Supplementary Materials

Table S1: Categories with reduced quota as compared to a representative sample.

|                | Final % | Representative % | % Difference |
|----------------|---------|------------------|--------------|
| Male 18-24     | 4.19    | 5.5              | 1.31         |
| Male 25-34     | 8.64    | 9.13             | 0.49         |
| Female 45-54   | 10.63   | 11.06            | 0.43         |
| Female 65+     | 5.58    | 6.56             | 0.98         |
| Vienna         | 22.99   | 23.44            | 0.45         |
| Upper Austria  | 15.08   | 16.69            | 1.6          |
| Salzburg       | 5.25    | 6.31             | 1.06         |
| Tyrol          | 7.57    | 8.5              | 0.93         |
| Vorarlberg     | 3.46    | 4.44             | 0.98         |
| High Education | 43.59   | 53.06            | 9.47         |

Below the significant results from the Bonferonni-corrected post-hoc analyses for age, marital status, income and physical activity are reported.

Table S2. Significant results of Bonferroni corrected post-hoc-tests for age groups.

|                                                                                                                        |
|------------------------------------------------------------------------------------------------------------------------|
| WHOQOL-BREF-psychological domain                                                                                       |
| 18 – 24 vs. 35-44 ( $p = .01$ ), vs. 45-54 ( $p = .02$ ), vs. 55 – 64 ( $p < .001$ ) and vs. 65+ ( $p < .001$ )        |
| 25 – 34 vs. 55 – 64 ( $p = .03$ ) and vs. 65+ ( $p < .001$ )                                                           |
| 35 – 44 vs. 65+ ( $p = .05$ )                                                                                          |
| 45 – 54 vs. 65+ ( $p = .02$ )                                                                                          |
| WHO-5                                                                                                                  |
| 18 – 24 vs. 35-44 ( $p = .04$ ), vs. 45-54 ( $p = 0.03$ ), vs. 55 – 64 ( $p < .001$ ) and vs. 65+ ( $p < .001$ )       |
| 25 – 34 vs. 65+ ( $p < .001$ )                                                                                         |
| 35 – 44 vs. 65+ ( $p = .008$ )                                                                                         |
| 45 – 54 vs. 65+ ( $p < .001$ )                                                                                         |
| 55 – 64 vs. 65+ ( $p = .05$ )                                                                                          |
| PSS-10                                                                                                                 |
| 18 – 24 vs. 35 – 44 ( $p < .001$ ), vs. 45 – 54 ( $p < .001$ ), vs. 55 – 64 ( $p < .001$ ), and vs. 65+ ( $p < .001$ ) |
| 25 – 34 vs. 45 – 54 ( $p = .03$ ) vs. 55 – 64 ( $p < .001$ ) and vs. 65+ ( $p < .001$ )                                |
| 35 – 44 vs. 55 – 64 ( $p = .01$ ) and vs. 65+ ( $p < .001$ )                                                           |

|                                                                                                                                                    |
|----------------------------------------------------------------------------------------------------------------------------------------------------|
| 45 – 54 vs. 65+ ( $p < .001$ )                                                                                                                     |
| 55 – 64 vs. 65+ ( $p = .02$ )                                                                                                                      |
| ISI                                                                                                                                                |
| 18 – 24 vs. 55 – 64 ( $p = .004$ ) and vs. 65 ( $p < .001$ )                                                                                       |
| 25 – 34 vs. 65+ ( $p < .001$ )                                                                                                                     |
| 35 – 44 vs. 65+ ( $p < .001$ )                                                                                                                     |
| 45 – 54 vs. 65+ ( $p < .001$ )                                                                                                                     |
| GAD-7                                                                                                                                              |
| 18 – 24 vs. 35 – 44 ( $p < .001$ ), vs. 45 – 54 ( $p < .001$ ) vs. 55 – 64 ( $p < .001$ ), and vs. 65+ ( $p < .001$ )                              |
| 25 – 34 vs. 55 – 64 ( $p = .003$ ) and vs. 65+ ( $p < .001$ )                                                                                      |
| 35 – 44 vs. 65+ ( $p < .001$ )                                                                                                                     |
| 45 – 54 vs. 65+ ( $p = .001$ )                                                                                                                     |
| 55 – 64 vs. 65+ ( $p = .01$ )                                                                                                                      |
| PHQ-9                                                                                                                                              |
| 18 – 24 vs. 25 – 34 ( $p = .006$ ), vs. 35 – 44 ( $p < .001$ ), vs. 45 – 54 ( $p < .001$ ), vs. 55 – 64 ( $p < .001$ ), and vs. 65+ ( $p < .001$ ) |
| 25 – 34 vs. 35 – 44 ( $p = .006$ ), vs. 55 – 64 ( $p < .001$ ), and vs. 65+ ( $p < .001$ )                                                         |
| 35 – 44 vs. 65+ ( $p < .001$ )                                                                                                                     |
| 45 – 54 vs. 65+ ( $p < .001$ )                                                                                                                     |
| 55 – 64 vs. 65+ ( $p = .02$ )                                                                                                                      |

Table S3: Significant results of Bonferroni corrected post-hoc-tests for marital status.

|                                                                    |
|--------------------------------------------------------------------|
| WHOQOL-BREF-psychological domain                                   |
| single vs. married ( $p < .001$ ) and vs. cohabiting ( $p = .02$ ) |
| separated vs. married ( $p = .003$ )                               |

|                                                                                                 |
|-------------------------------------------------------------------------------------------------|
| WHO-5                                                                                           |
| single vs. married ( $p < .001$ ) and vs. widowed ( $p = .03$ )                                 |
| separated vs. married ( $p < .001$ ) and vs. widowed ( $p < .001$ )                             |
| PSS-10                                                                                          |
| single vs. married ( $p < .001$ ) and vs. widowed ( $p = .02$ )                                 |
| separated vs. married ( $p = .01$ ), vs. widowed ( $p < .001$ ) and vs. divorced ( $p = .001$ ) |
| married vs. cohabiting ( $p = .03$ )                                                            |
| ISI                                                                                             |
| separated vs. married ( $p = .04$ )                                                             |
| GAD-7                                                                                           |
| single vs. married ( $p < .001$ )                                                               |
| separated vs. married ( $p = .03$ )                                                             |
| PHQ-9                                                                                           |
| single vs. married ( $p < .001$ )                                                               |
| separated vs. married ( $p = .007$ )                                                            |
| married vs. cohabiting ( $p = .04$ )                                                            |

Table S4: Significant results of Bonferroni corrected post-hoc-tests for monthly net income.

|                                                                                          |
|------------------------------------------------------------------------------------------|
| WHOQOL-BREF-psychological domain                                                         |
| <1000 vs. 2-3000 ( $p < .001$ ), vs. 3-4000 ( $p < .001$ ), and vs. >4000 ( $p < .001$ ) |
| 1-2000 vs. 3-4000 ( $p < .001$ ), vs. >4000 ( $p < .001$ )                               |
| 2-3000 vs. >4000 ( $p < .001$ )                                                          |
| 3-4000 vs. >4000 ( $p = .03$ )                                                           |
| WHO-5                                                                                    |

|                                                                                                                   |
|-------------------------------------------------------------------------------------------------------------------|
| <1000 vs. 2-3000 ( $p = .006$ ), vs. 3-4000 ( $p = .002$ ), and vs. >4000 ( $p < .001$ )                          |
| 1-2000 vs. >4000 ( $p < .001$ )                                                                                   |
| 2-3000 vs. >4000 ( $p < .01$ )                                                                                    |
| PSS-10                                                                                                            |
| <1000 vs. 2-3000 ( $p < .02$ ), vs. 3-4000 ( $p = .001$ ), and vs. >4000 ( $p < .001$ )                           |
| 1-2000 vs. 3-4000 ( $p = .03$ ), vs. >4000 ( $p < .001$ )                                                         |
| 2-3000 vs. >4000 ( $p = .005$ )                                                                                   |
| ISI                                                                                                               |
| <1000 vs. >4000 ( $p < .001$ )                                                                                    |
| 1-2000 vs. >4000 ( $p < .001$ )                                                                                   |
| 2-3000 vs. >4000 ( $p < .001$ )                                                                                   |
| 3-4000 vs. >4000 ( $p = .005$ )                                                                                   |
| GAD-7                                                                                                             |
| <1000 vs. 2-3000 ( $p = .006$ ), vs. 3-4000 ( $p = .002$ ), and vs. >4000 ( $p < .001$ )                          |
| 1-2000 vs. >4000 ( $p < .001$ )                                                                                   |
| 2-3000 vs. >4000 ( $p = .007$ )                                                                                   |
| PHQ-9                                                                                                             |
| <1000 vs. 1-2000 ( $p = .03$ ) vs. 2-3000 ( $p < .001$ ), vs. 3-4000 ( $p < .001$ ), and vs. >4000 ( $p < .001$ ) |
| 1-2000 vs. 3-4000 ( $p = .03$ ), vs. >4000 ( $p < .001$ )                                                         |
| 2-3000 vs. >4000 ( $p = .001$ )                                                                                   |

Table S5: Significant results of Bonferroni corrected post-hoc-tests for number of days of physical activity per week.

|                                                                                              |
|----------------------------------------------------------------------------------------------|
| WHOQOL-BREF-psychological domain                                                             |
| 0 vs. 1 ( $p = .003$ ), vs. 2 ( $p < .001$ ), vs. 3 ( $p < .001$ ) and vs. >4 ( $p < .001$ ) |

|                                                                              |
|------------------------------------------------------------------------------|
| 1 vs. >4 (p = .007)                                                          |
| 2 vs. >4 (p = .02)                                                           |
| WHO-5                                                                        |
| 0 vs. 1 (p = .008), vs. 2 (p < .001), vs. 3 (p < .001) and vs. >4 (p < .001) |
| 1 vs. >4 (p < .001)                                                          |
| 2 vs. >4 (p = .005)                                                          |
| PSS-10                                                                       |
| 0 vs. 2 (p = .005), vs. 3 (p < .001) and vs. >4 (p < .001)                   |
| ISI                                                                          |
| 0 vs. >4 (p = .03)                                                           |
| GAD-7                                                                        |
| 0 vs. 3 (p < .01) and vs. >4 (p < .001)                                      |
| PHQ-9                                                                        |
| 0 vs. 2 (p = .04), vs. 3 (p < .001) and vs. >4 (p < .001)                    |
| 1 vs. >4 (p = .04)                                                           |
| 2 vs. >4 (p = .03)                                                           |

The results of the current survey were compared with those from other representative surveys conducted in 2019 and during the April 2020 lockdown. All three surveys included PHQ-8 scores for depressive symptoms and WHOQOL-BREF scores for quality of life in the psychological domain.

Table S6: Comparisons of PHQ-8 depression and WHOQOL-BREF quality of life in 2019, the April lockdown and the December/January lockdown.

|                                            |           | Sample                  |                          |                               | Statistic                           |
|--------------------------------------------|-----------|-------------------------|--------------------------|-------------------------------|-------------------------------------|
|                                            |           | ATHIS 2019<br>N=7417876 | April lockdown<br>N=1005 | Dec/Jan<br>lockdown<br>N=1505 |                                     |
| <b>PHQ-8 Cut-off</b>                       | ≥ 10      | 416844 (5.6%)           | 200<br>(19.9%)           | 378<br>(25.1%)                | $\chi^2(2) = 1463.2$ ,<br>p<0.001   |
| <b>PHQ-8 score</b>                         | M<br>(SD) | 2.76 (3.44)             | 5.93 (5.0)               | 6.54 (5.48)                   | F (2, 7420382) =<br>1334.7, p<0.001 |
| <b>WHOQOL<br/>psychological<br/>domain</b> | M<br>(SD) | 79.74 (15.06)           | 69.83<br>(18.7)          | 68.89<br>(18.66)              | F (2, 7420382) =<br>607.56, p<0.001 |

Table S7: Percentage of people with moderate depression, mean depression score and mean quality of life score in 2018/19, April 2020 and December 2020/January 2021 according to gender. The changes between pre-pandemic and December 2020/January 2021 are also shown.

|                                |               | 2018/2019 |        | April lockdown |        | Dec/Jan lockdown |                |
|--------------------------------|---------------|-----------|--------|----------------|--------|------------------|----------------|
|                                |               | Male      | Female | Male           | Female | Male             | Female         |
| <b>Moderate depression (%)</b> | PHQ-8 ≥ 10    | 4.4%      | 6.8%   | 15.6%          | 23.8%  | 19.4% (+15%)     | 30.6% (+23.8%) |
| <b>Depression score (mean)</b> | PHQ-8         | 2.35      | 3.15   | 5.15           | 6.63   | 5.65 (+3.3)      | 7.41 (+4.3)    |
| <b>Quality of life (mean)</b>  | WHOQ OL PSYCH | 81.11     | 78.43  | 72.75          | 67.21  | 71.87 (-9.24%)   | 66.0 (-12.43%) |

The results from the current survey were also compared with results from a different, but also representative, sample surveyed during the first lockdown in April in Austria. The comparisons of the percentage of people over the cut-off scores for depression, anxiety and insomnia according to age group and family status are presented below.

Table S8: Percentage of people over the cut-off for moderate depression, anxiety and insomnia by age category in the first and second lockdowns.

|                                    |      | April lockdown            |                      |                     |                    |                     |                     |
|------------------------------------|------|---------------------------|----------------------|---------------------|--------------------|---------------------|---------------------|
|                                    |      | 18-24                     | 25-34                | 35-44               | 45-54              | 55-64               | 65+                 |
| <b>PHQ-9 score (%)</b>             | ≥ 10 | 32.2                      | 33.7                 | 20.0                | 19.8               | 16.0                | 5.3                 |
| <b>GAD-7 score (%)</b>             | ≥ 10 | 22.0                      | 27.1                 | 20.0                | 19.8               | 16.6                | 6.8                 |
| <b>ISI score (%)</b>               | ≥ 15 | 18.6                      | 18.1                 | 14.1                | 20.3               | 16.0                | 4.5                 |
|                                    |      | December/January lockdown |                      |                     |                    |                     |                     |
|                                    |      | 18-24                     | 25-34                | 35-44               | 45-54              | 55-64               | 65+                 |
| <b>PHQ-9 score (%)</b>             | ≥ 10 | 50.3                      | 30.5                 | 25.3                | 24.5               | 22.1                | 11.8                |
| <b>Lockdown comparison (PHQ-9)</b> |      | t(269)=3.03, p<0.01)      | t(443)=0.72, p>0.05) | t(472)=1.32, p>0.05 | t(546)=1.3, p>0.05 | t(451)=1.59, p>0.05 | t(317)=2.02, p<0.05 |
| <b>GAD-7 score (%)</b>             | ≥ 10 | 34.6                      | 28.3                 | 23.2                | 24.9               | 18.8                | 10.2                |
| <b>ISI score (%)</b>               | ≥ 15 | 25.5                      | 18.3                 | 20.8                | 21.2               | 15.1                | 11.3                |

Table S9: Percentage of people over the cut-off for moderate depression, anxiety and insomnia by marital status in the first and second lockdowns.

|                        |      | <b>April lockdown</b>            |           |          |            |         |         |
|------------------------|------|----------------------------------|-----------|----------|------------|---------|---------|
|                        |      | single                           | separated | divorced | cohabiting | married | widowed |
| <b>PHQ-9 score (%)</b> | ≥ 10 | 26.9                             | 25.0      | 25.0     | 23.6       | 14.8    | 23.5    |
| <b>GAD-7 score (%)</b> | ≥ 10 | 21.4                             | 18.8      | 27.9     | 19.0       | 15.8    | 23.5    |
| <b>ISI score (%)</b>   | ≥ 15 | 17.1                             | 18.8      | 22.1     | 15.3       | 14.6    | 0       |
|                        |      | <b>December/January lockdown</b> |           |          |            |         |         |
|                        |      | single                           | separated | divorced | cohabiting | married | widowed |
| <b>PHQ-9 score (%)</b> | ≥ 10 | 35.1                             | 46.5      | 30.5     | 24.9       | 18.5    | 20.6    |
| <b>GAD-7 score (%)</b> | ≥ 10 | 27.1                             | 34.9      | 23.8     | 24.2       | 18.9    | 17.6    |
| <b>ISI score (%)</b>   | ≥ 15 | 20.6                             | 37.2      | 21.0     | 16.9       | 16.6    | 14.7    |
